# Supplementary material for: Bioselectivity Induced by Chirality of New Terpenyl Organoselenium Compounds
Source: PubMed Central journal article supplement (PMC6862013; doi:10.3390/ma12213579), 2019-10-31
Supplement: materials-12-03579-s001.pdf [file materials-12-03579-s001.pdf]

# Bioselectivity Induced by Chirality of New Terpenyl Organoselenium Compounds

Magdalena Obieziurska <sup>1</sup>, Agata J. Pacuła <sup>1</sup>, Angelika Długosz-Pokorska <sup>2</sup>, Marek Krzemiński <sup>1,†</sup>, Anna Janecka <sup>2</sup> and Jacek Ścianowski <sup>1,\*</sup>

<sup>1</sup> Department of Organic Chemistry, Faculty of Chemistry, Nicolaus Copernicus University, 7 Gagarin Street, 87-100 Torun, Poland; magdao@umk.pl (M.O.); pacula@umk.pl (A.J.P.); mkrzem@umk.pl (M.K.)

<sup>2</sup> Department of Biomolecular Chemistry, Faculty of Medicine, Medical University of Lodz, Mazowiecka 6/8, 92-215 Lodz, Poland; angelika.dlugosz@umed.lodz.pl (A.D.-P.); anna.janecka@umed.lodz.pl (A.J.)

\* Correspondence: jsch@umk.pl

† Dedicated to Professor Marek Zaidlewicz on the occasion of his 80th birthday

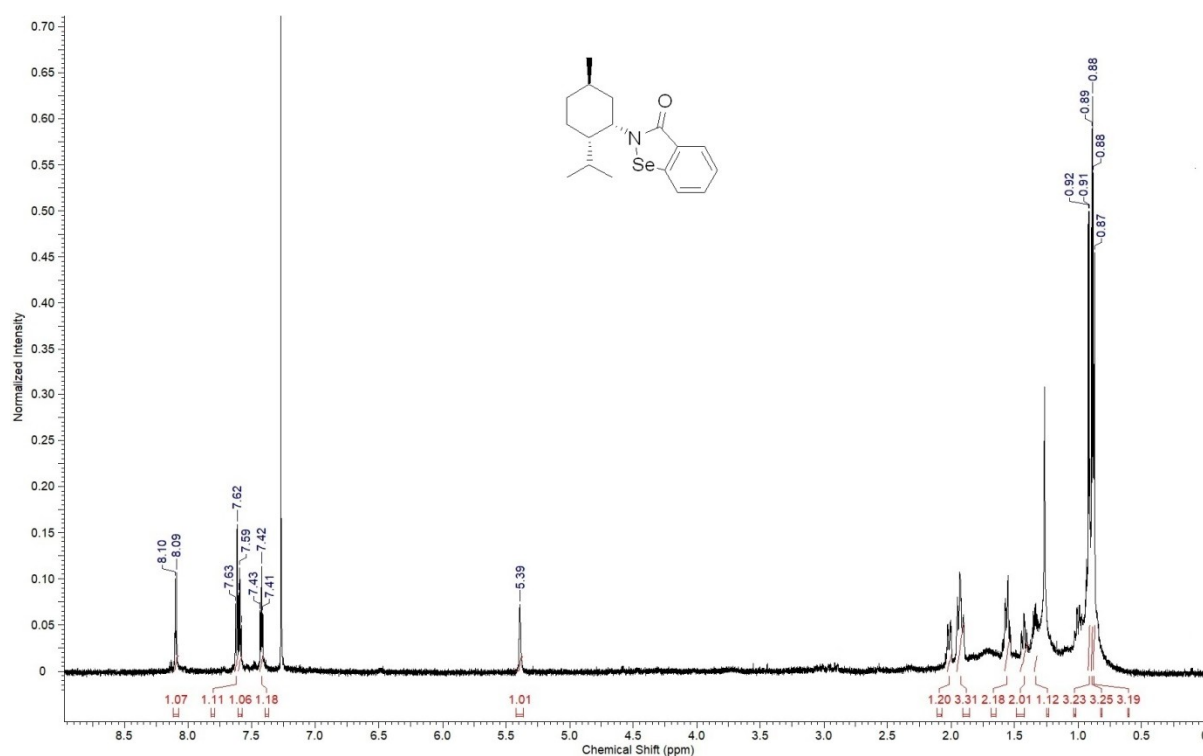

(a)

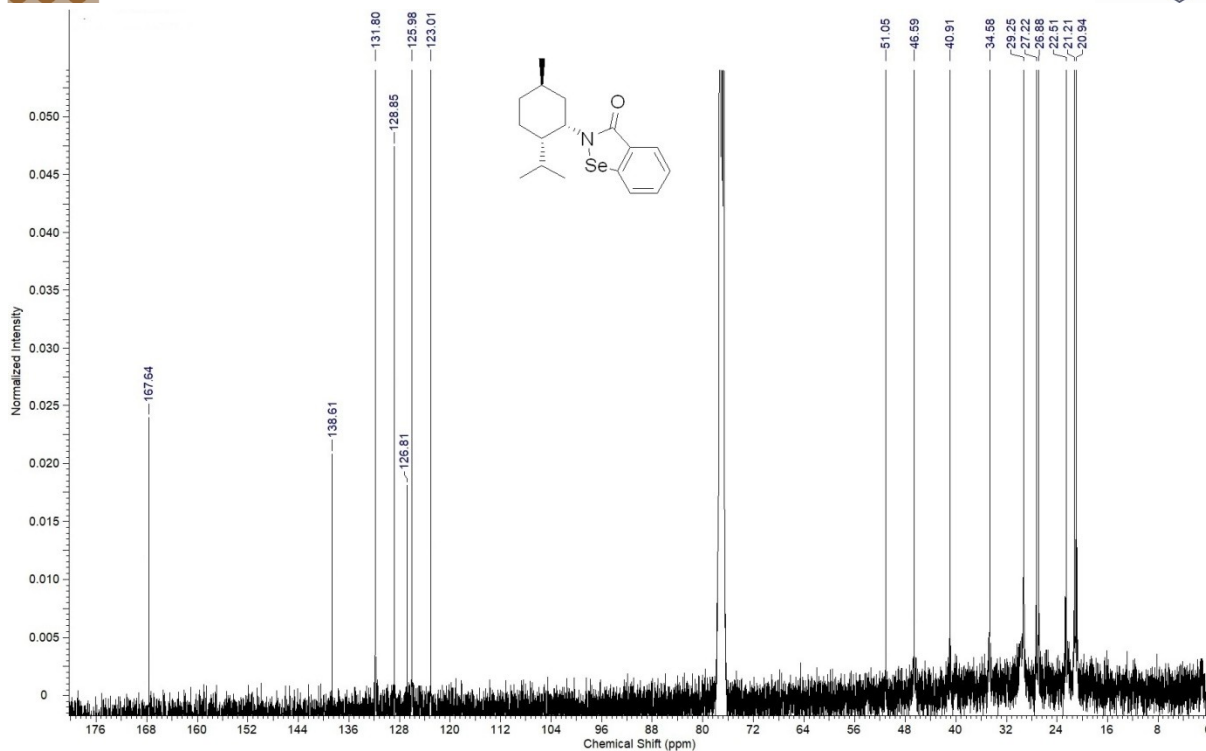

(b)

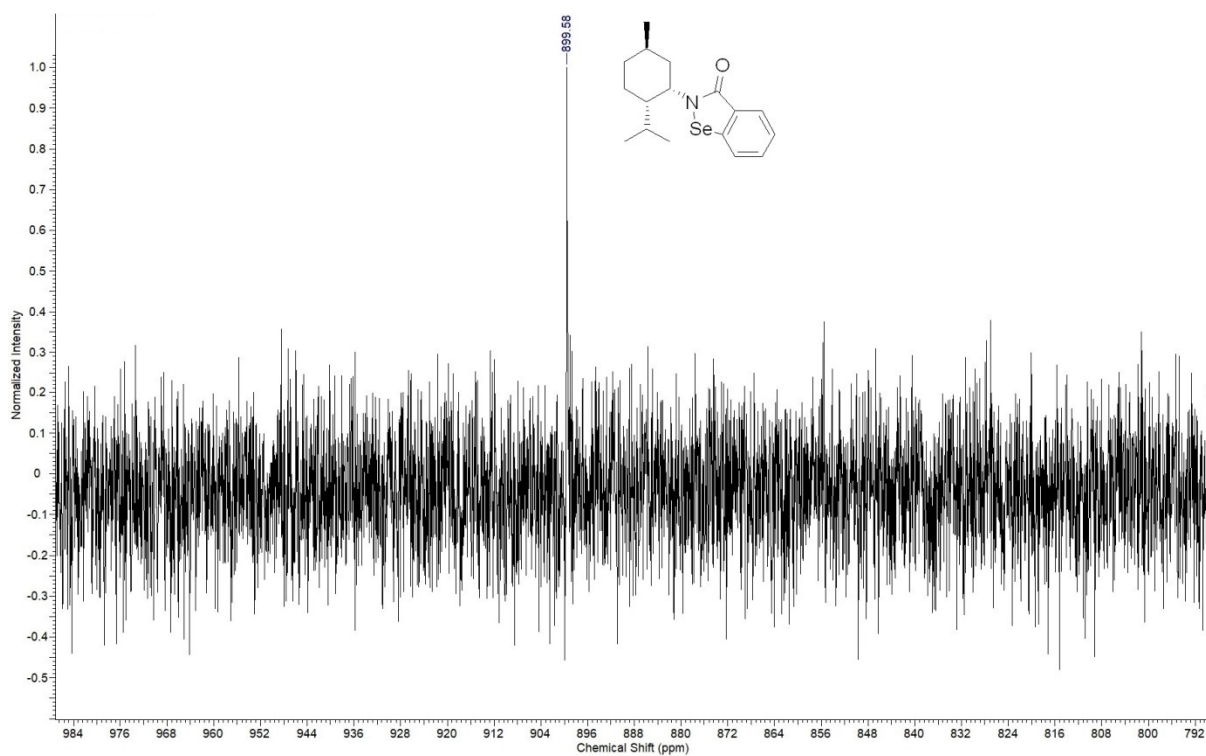

(c)

**Figure S1.** (a)  $^1\text{H}$  NMR, (b)  $^{13}\text{C}$  NMR, and (c)  $^{77}\text{Se}$  NMR spectra of  $(-)-N-(1S,2S,5R)$ -neomenthyl-1,2-benzisoselenazol-3(2H)-one **22**.

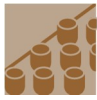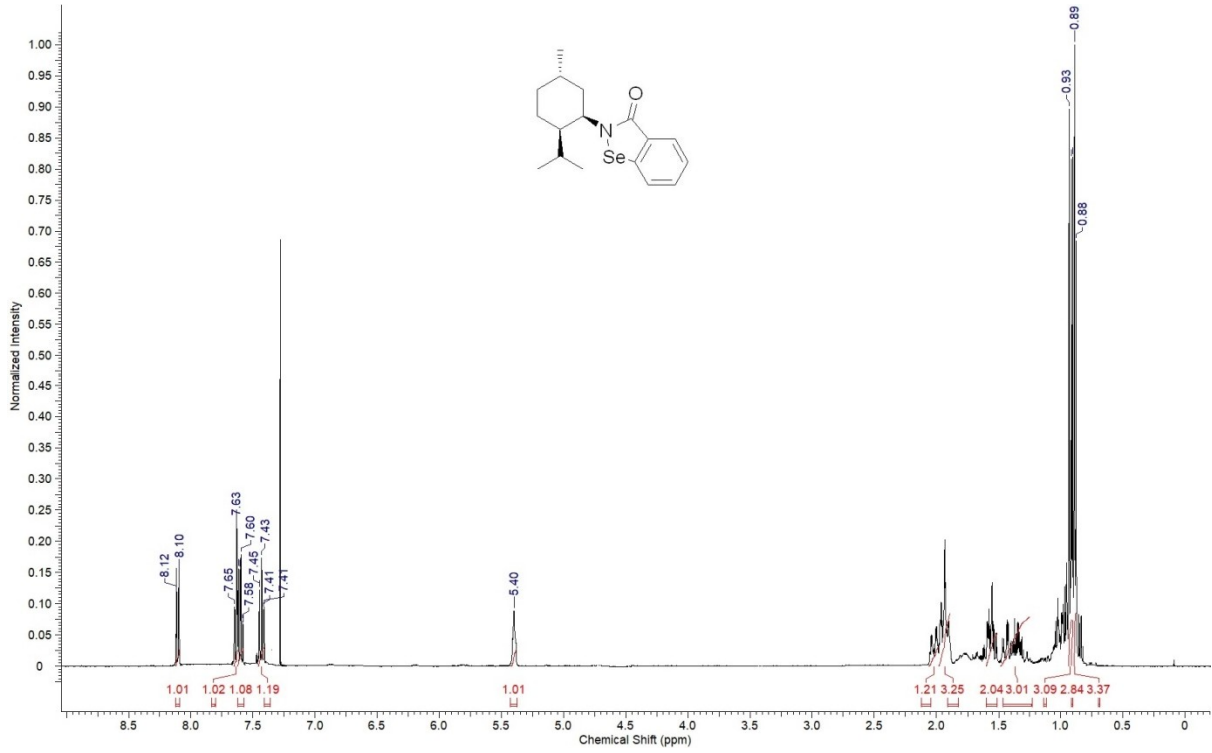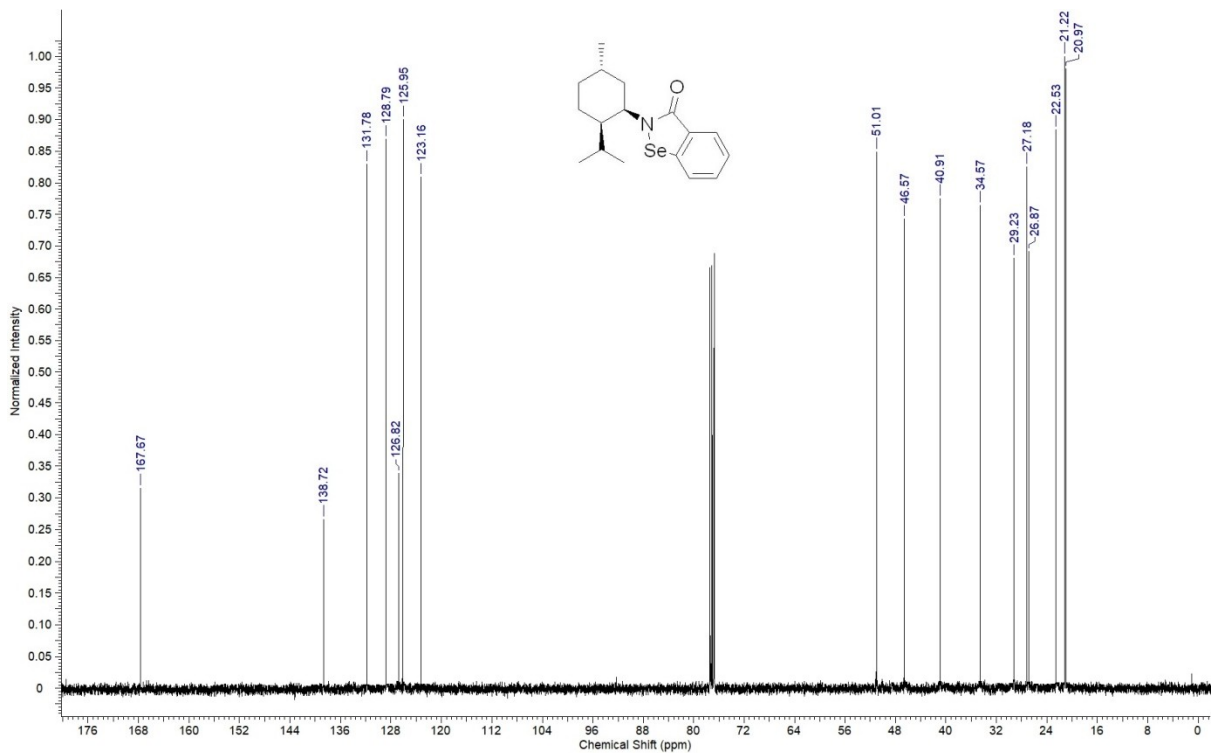

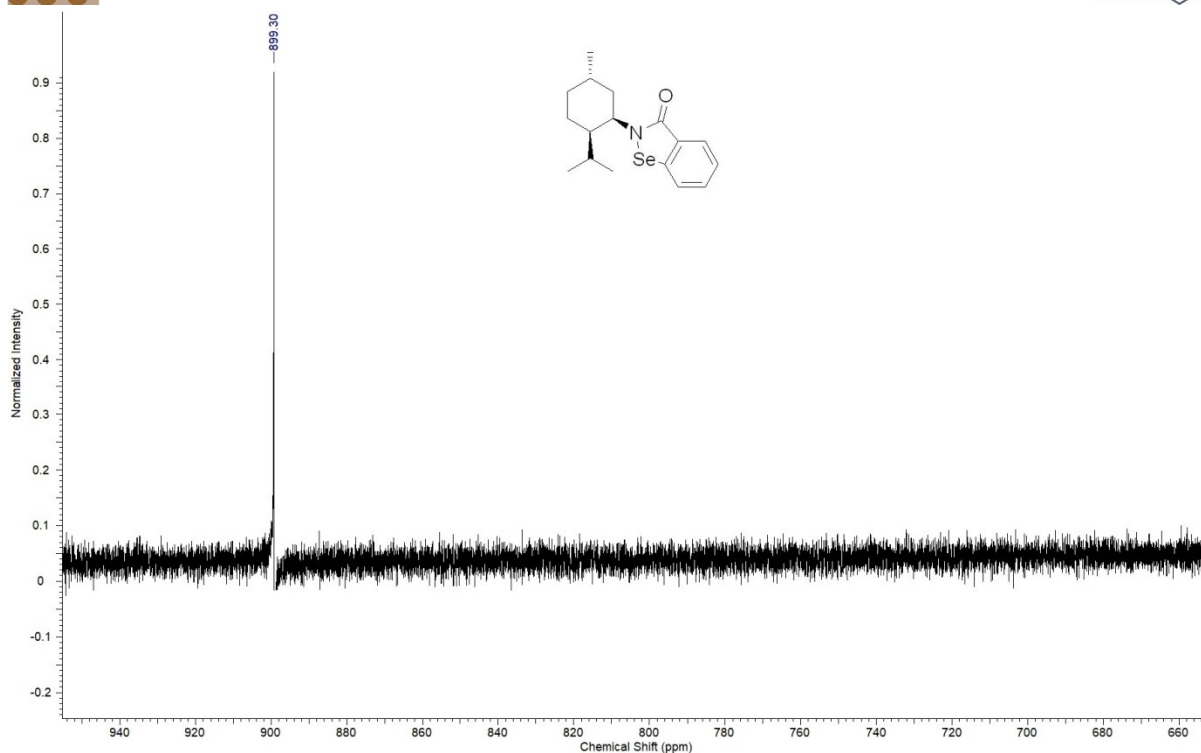

(c)

Figure S2. (a)  $^1\text{H}$  NMR, (b)  $^{13}\text{C}$  NMR, and (c)  $^{77}\text{Se}$  NMR spectra of (+)-*N*-(1*R*,2*R*,5*S*)-neomenthyl-1,2-benzisoselenazol-3(2*H*)-one **23**.

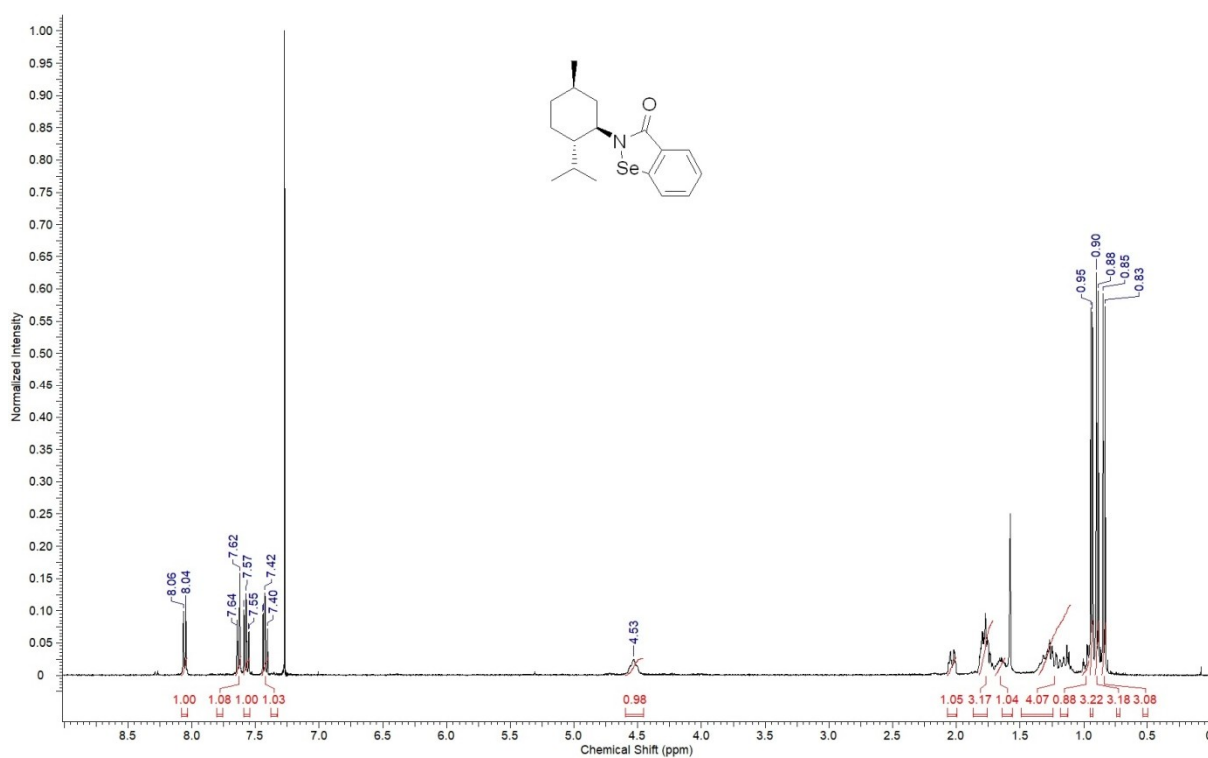

(a)

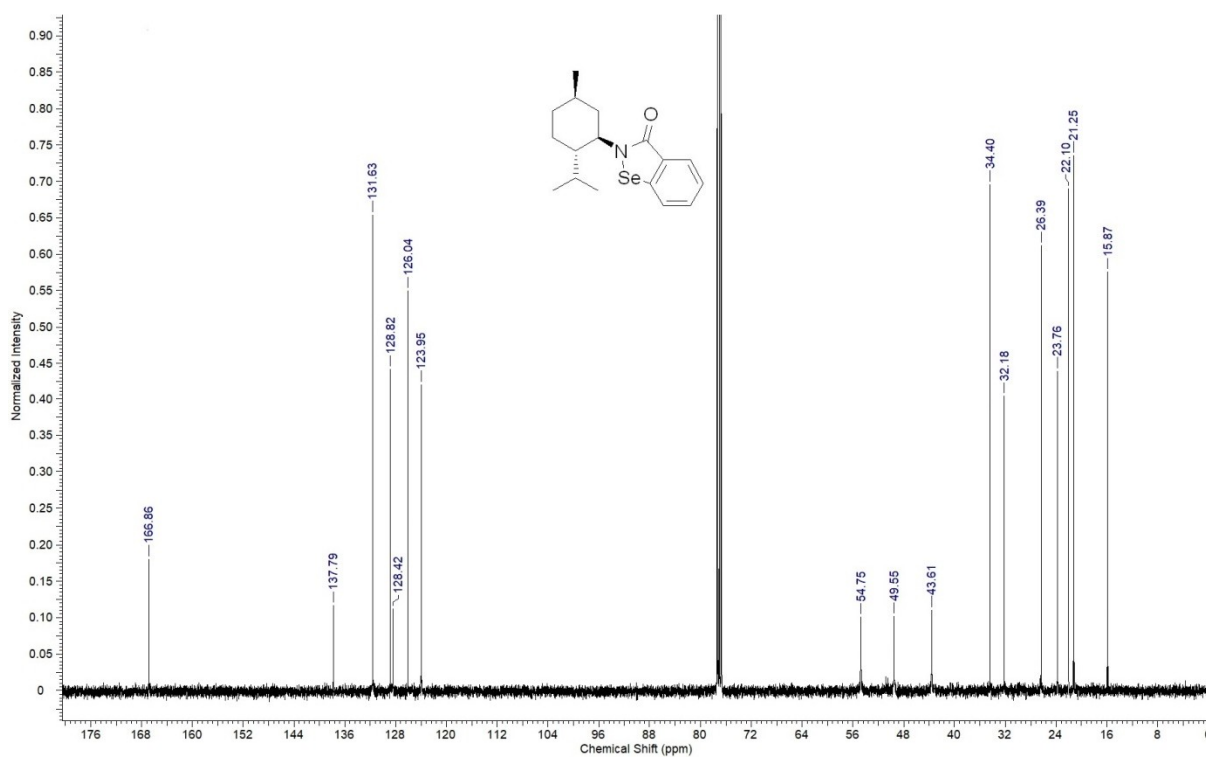

(b)

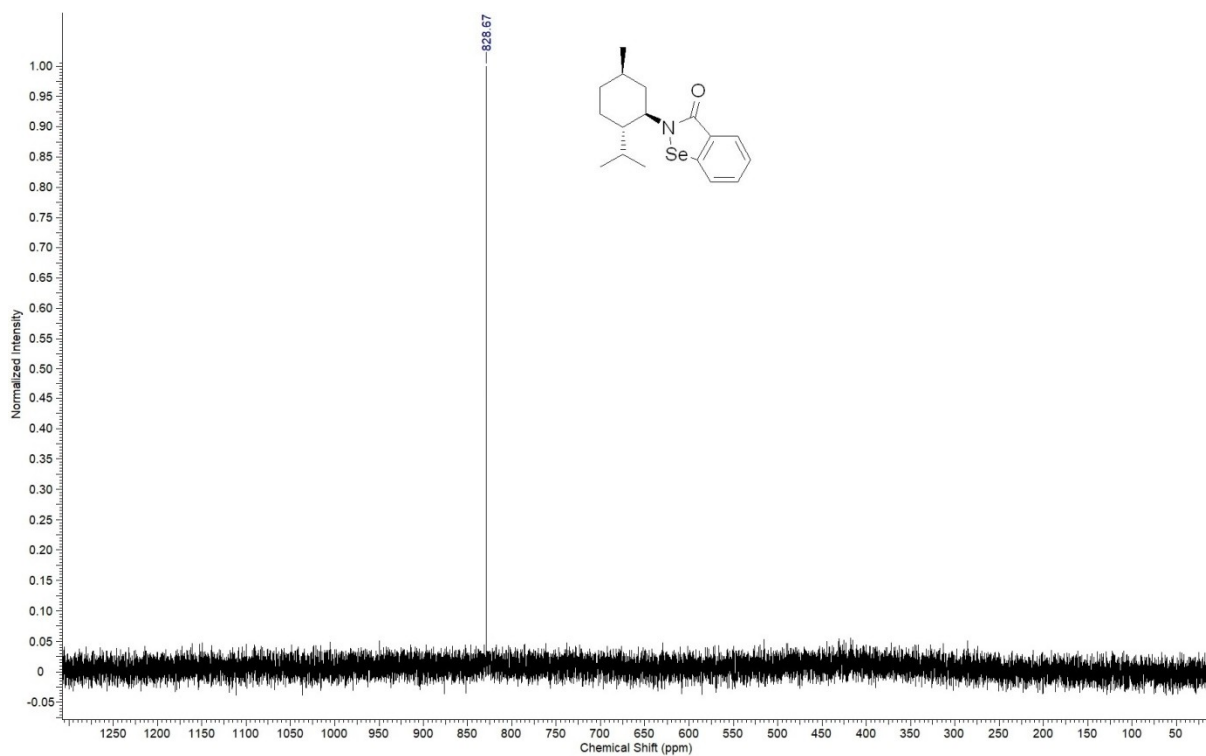

(c)

**Figure S3.** (a)  $^1\text{H}$  NMR, (b)  $^{13}\text{C}$  NMR, and (c)  $^{77}\text{Se}$  NMR spectra of *(-)-N-(1R,2S,5R)*-menthyl-1,2-benzoselenazol-3(2H)-one **24**.

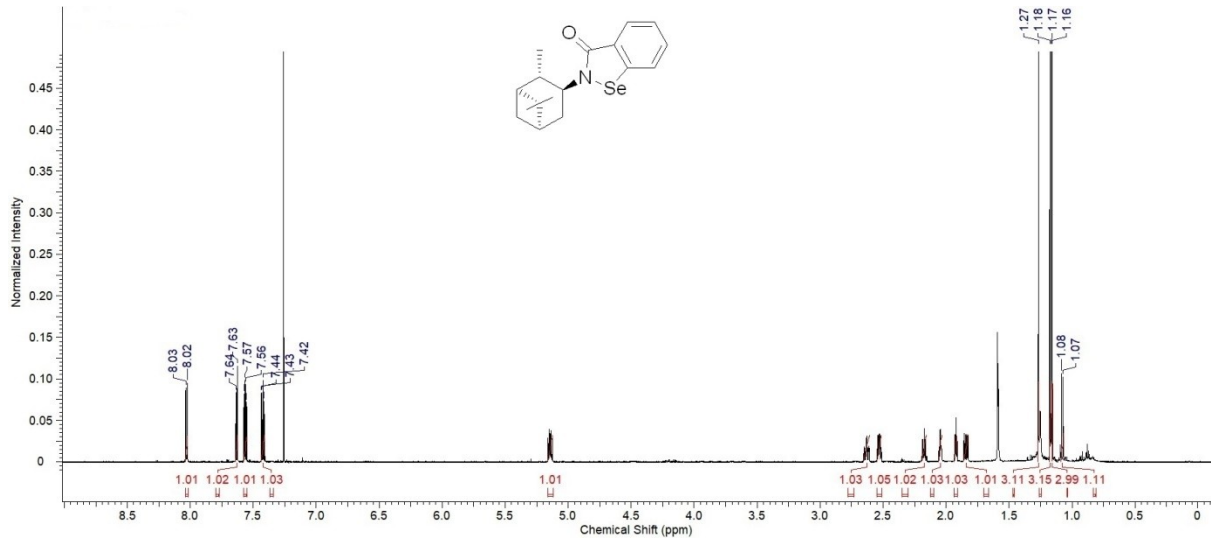

(a)

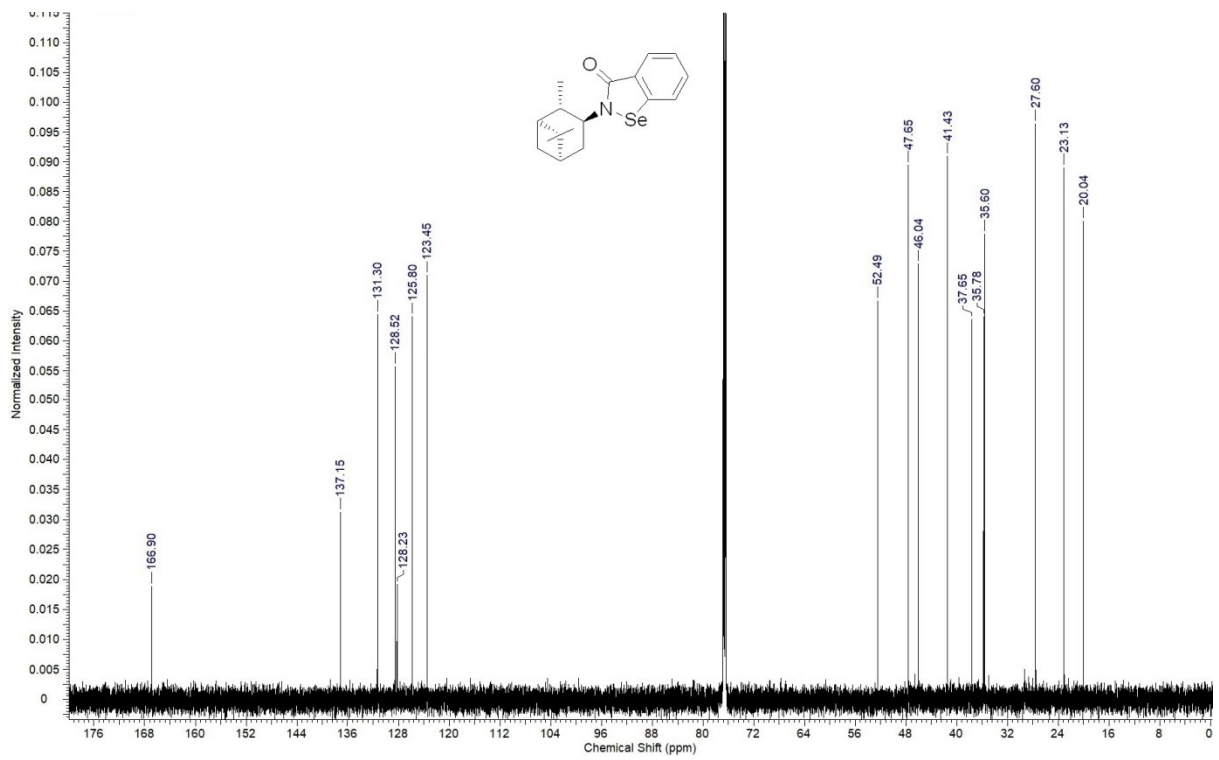

(b)

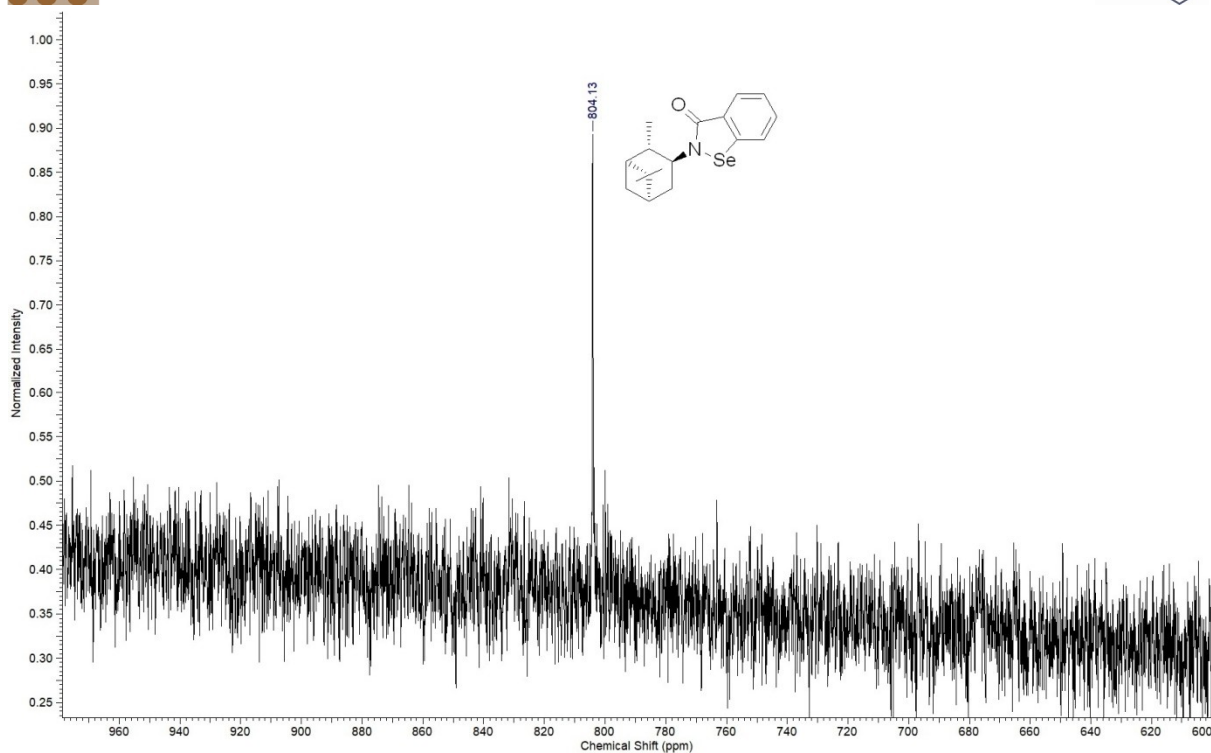

(c)

**Figure S4.** (a)  $^1\text{H}$  NMR, (b)  $^{13}\text{C}$  NMR, and (c)  $^{77}\text{Se}$  NMR spectra (–)-*N*-(1*S*,2*S*,3*S*,5*R*)-isopinocampheyl-1,2-benzisoselenazol-3(2*H*)-one **25**.

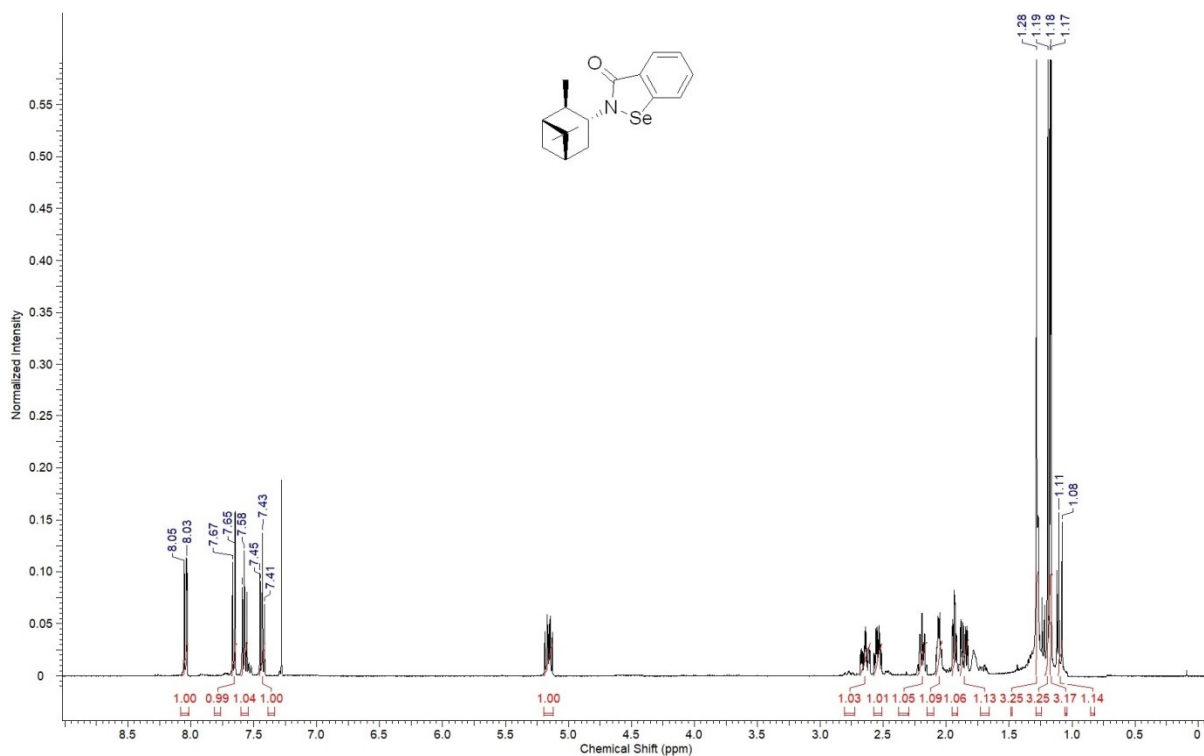

(a)

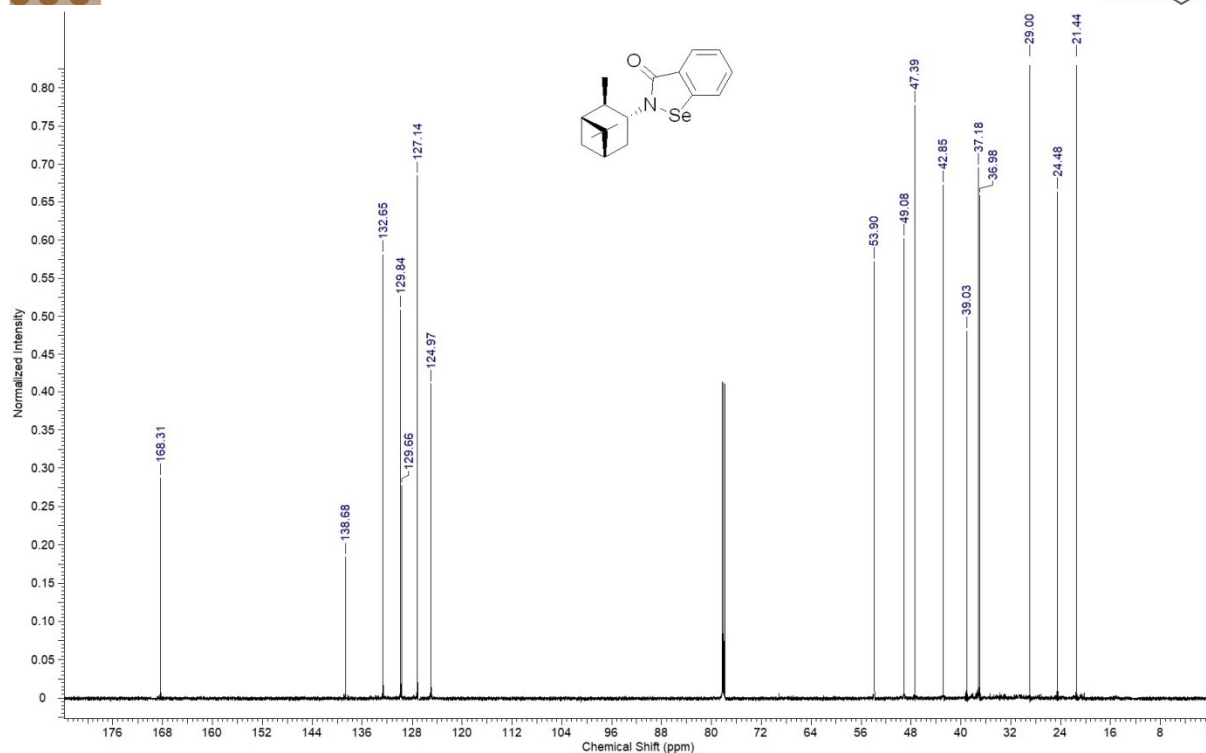

(b)

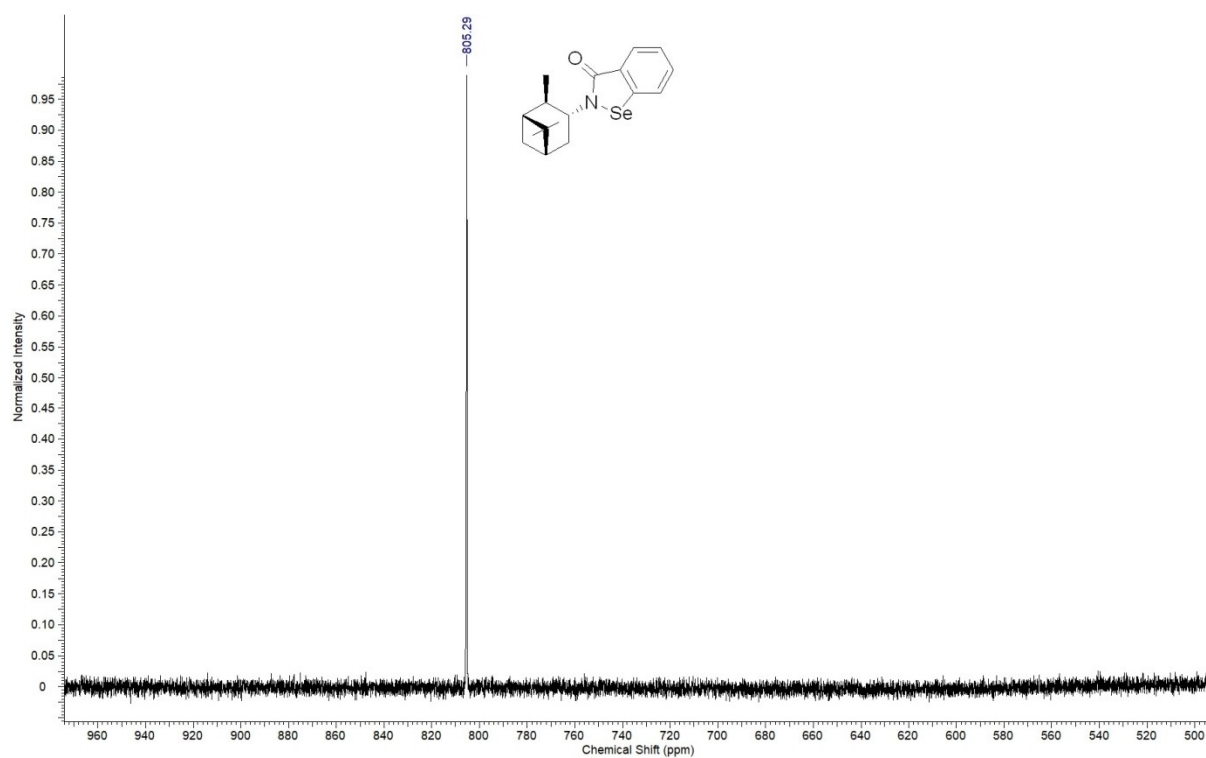

(c)

**Figure S5.** (a)  $^1\text{H}$  NMR, (b)  $^{13}\text{C}$  NMR, and (c)  $^{77}\text{Se}$  NMR spectra (+)-*N*-(1*R*,2*R*,3*R*,5*S*)-isopinocampheyl-1,2-benzisoselenazol-3(2*H*)-one **26**.



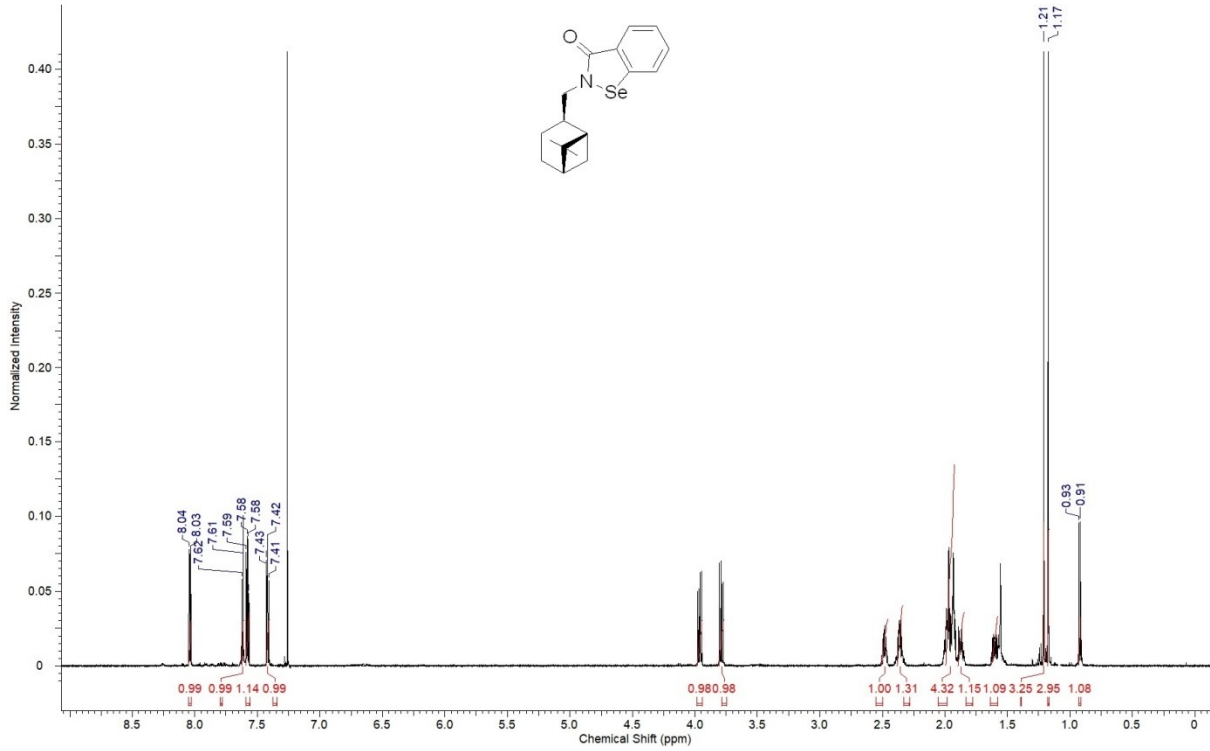

(a)

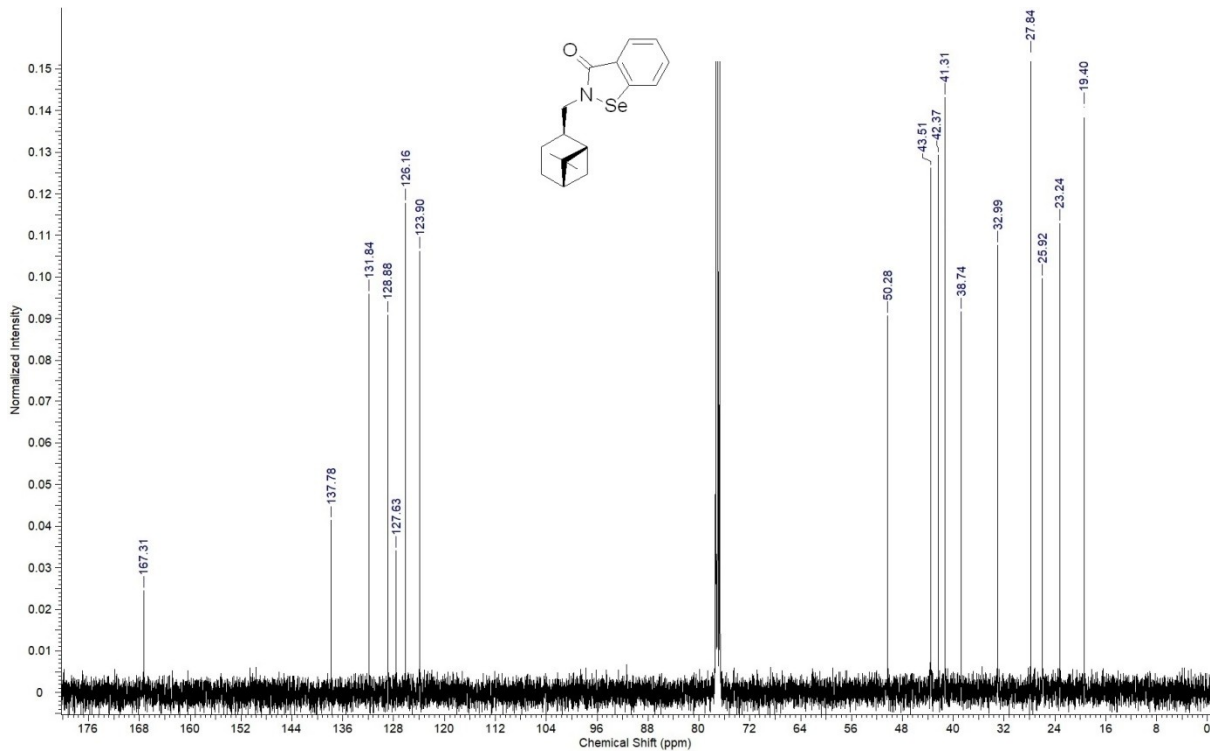

(b)

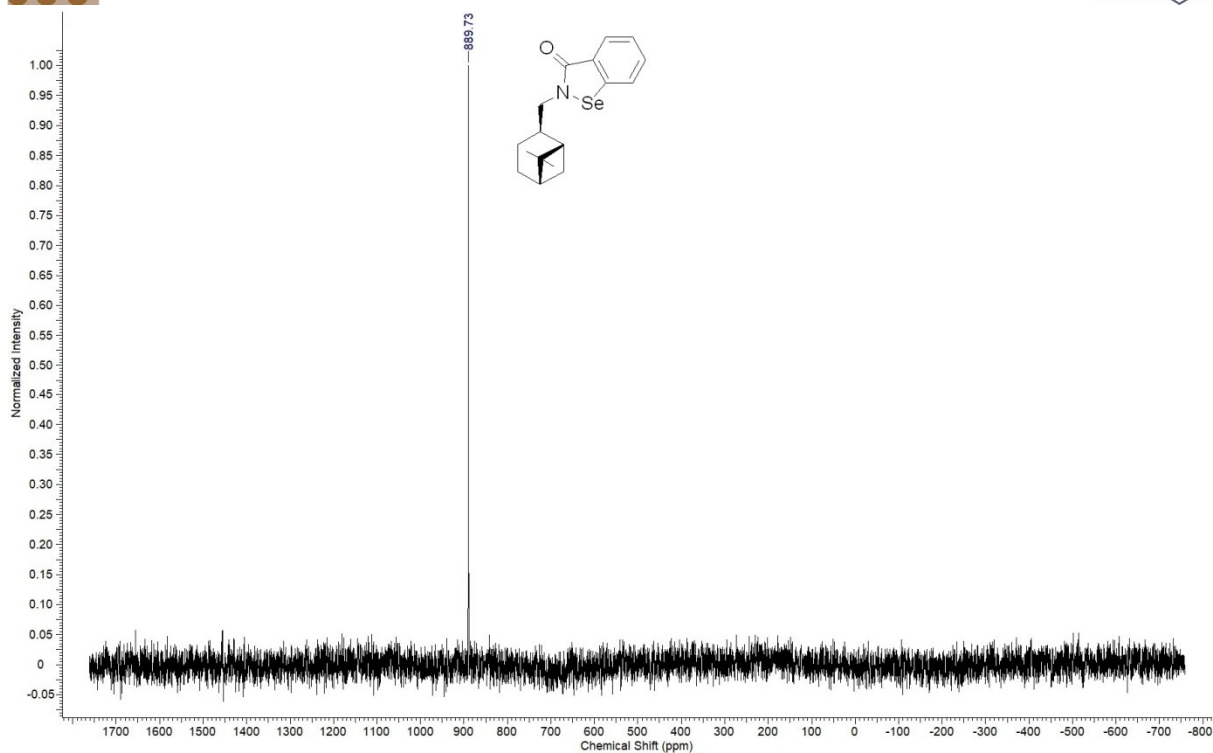

(c)

Figure S6. (a)  $^1\text{H}$  NMR, (b)  $^{13}\text{C}$  NMR, and (c)  $^{77}\text{Se}$  NMR spectra of (-)-*N*-(1*S*,2*R*,5*S*)-myrtanyl-1,2-benzisoselenazol-3(2*H*)-one **27**.

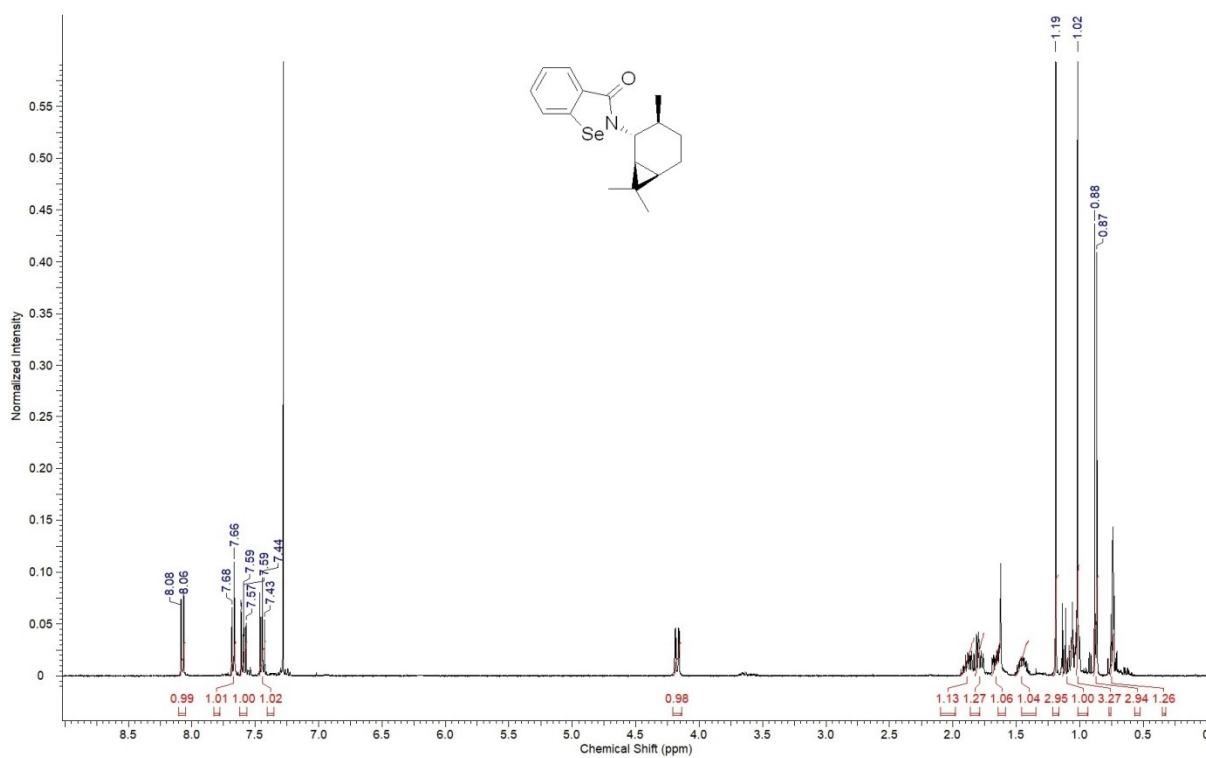

(a)

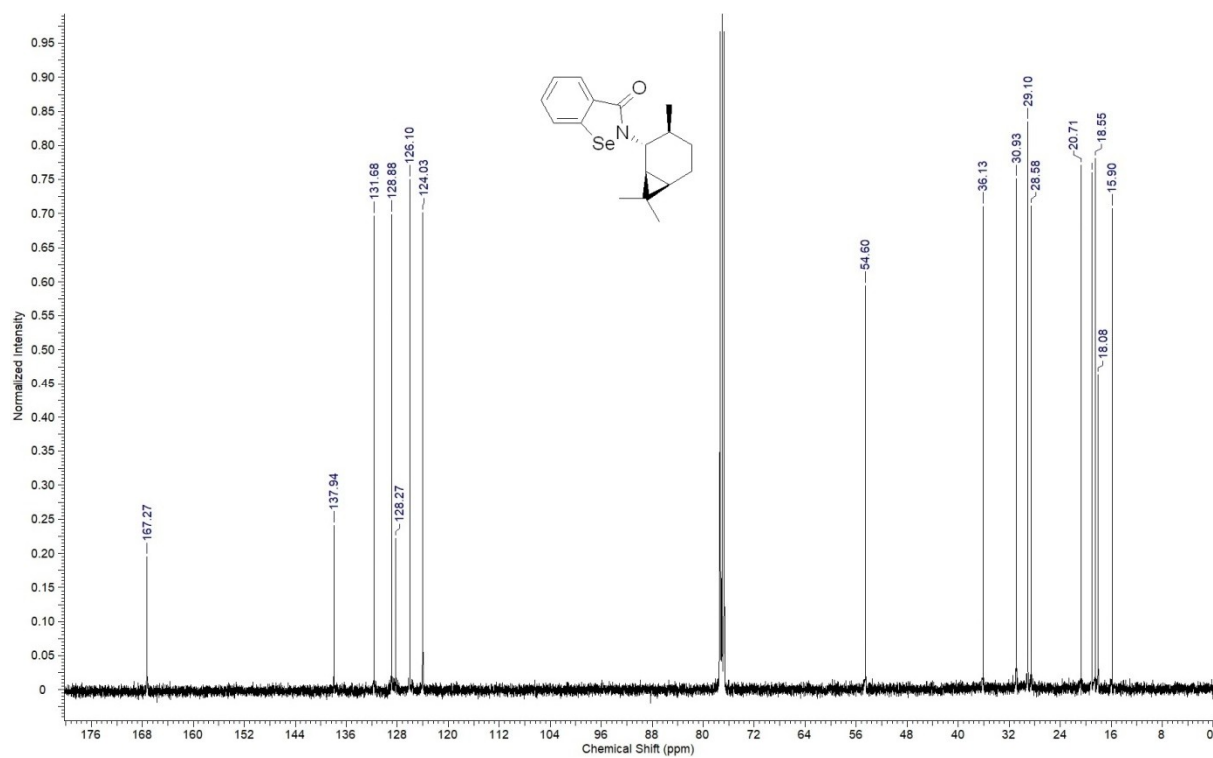

(b)

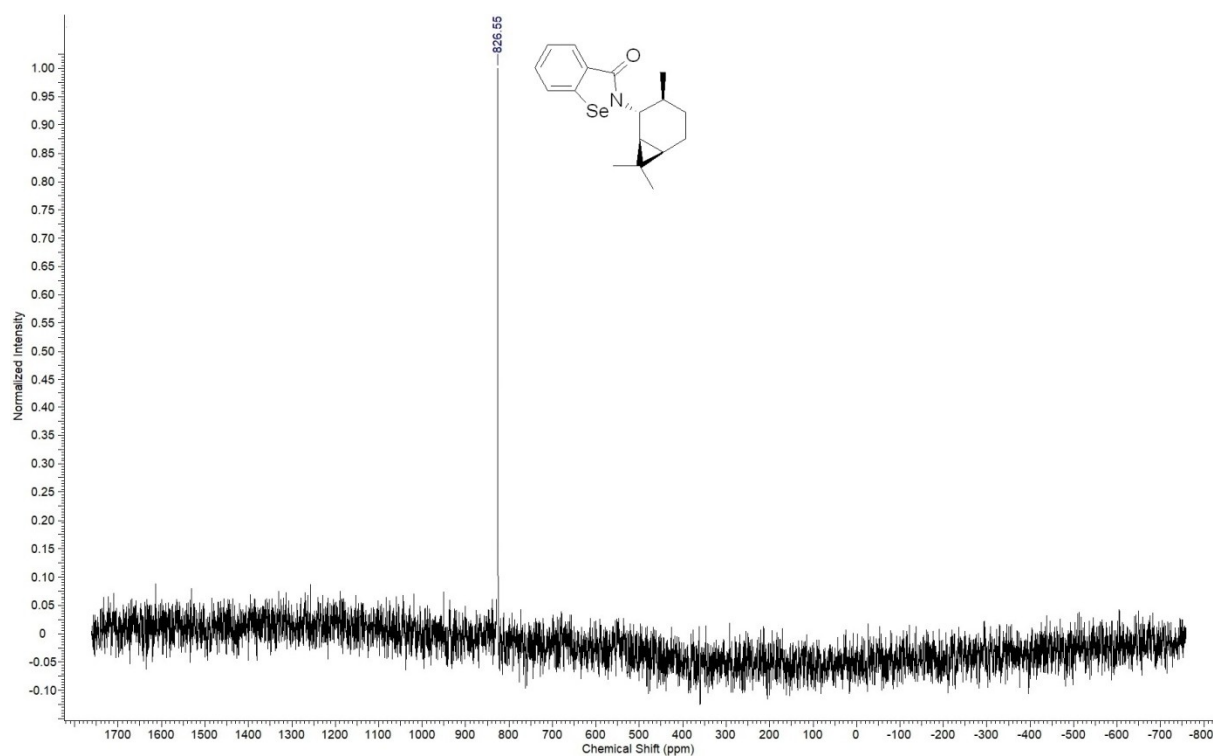

(c)

**Figure S7.** (a)  $^1\text{H}$  NMR, (b)  $^{13}\text{C}$  NMR, and (c)  $^{77}\text{Se}$  NMR spectra of (-)-N-(1S,2R,3S,6R)-(2-isocaranyl)-1,2-benzisoselenazol-3(2H)-one **28**.

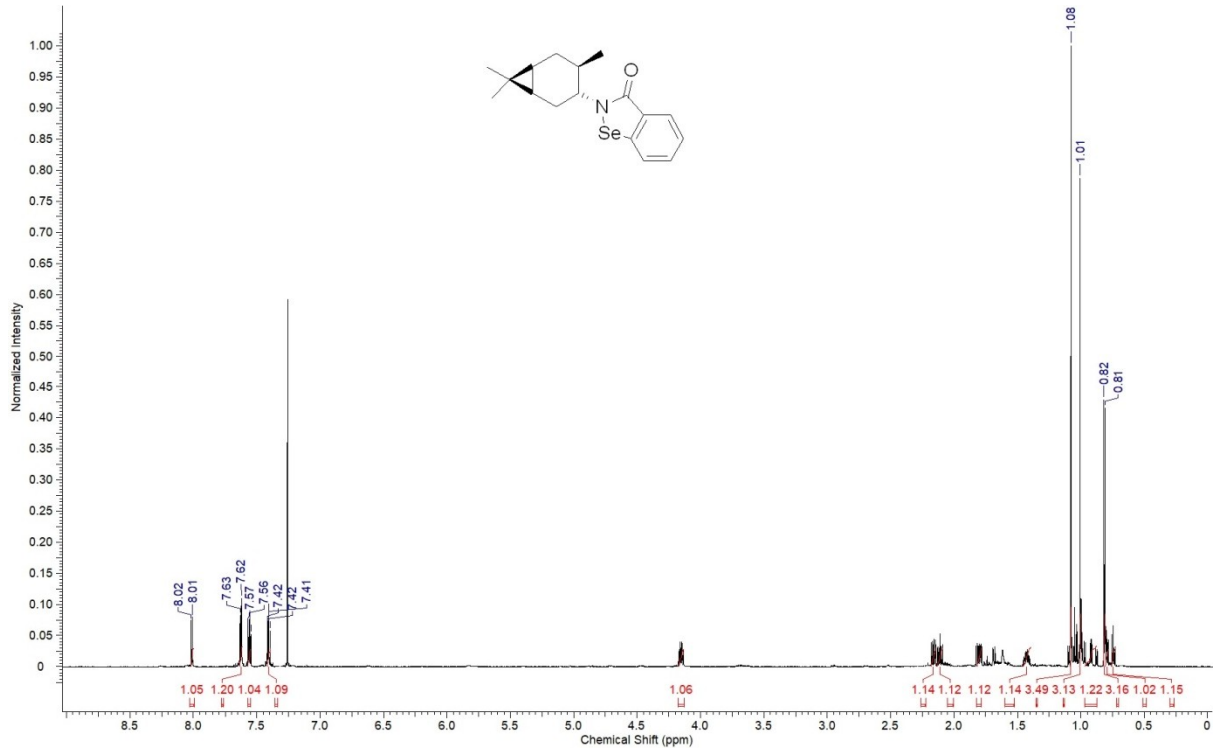

(a)

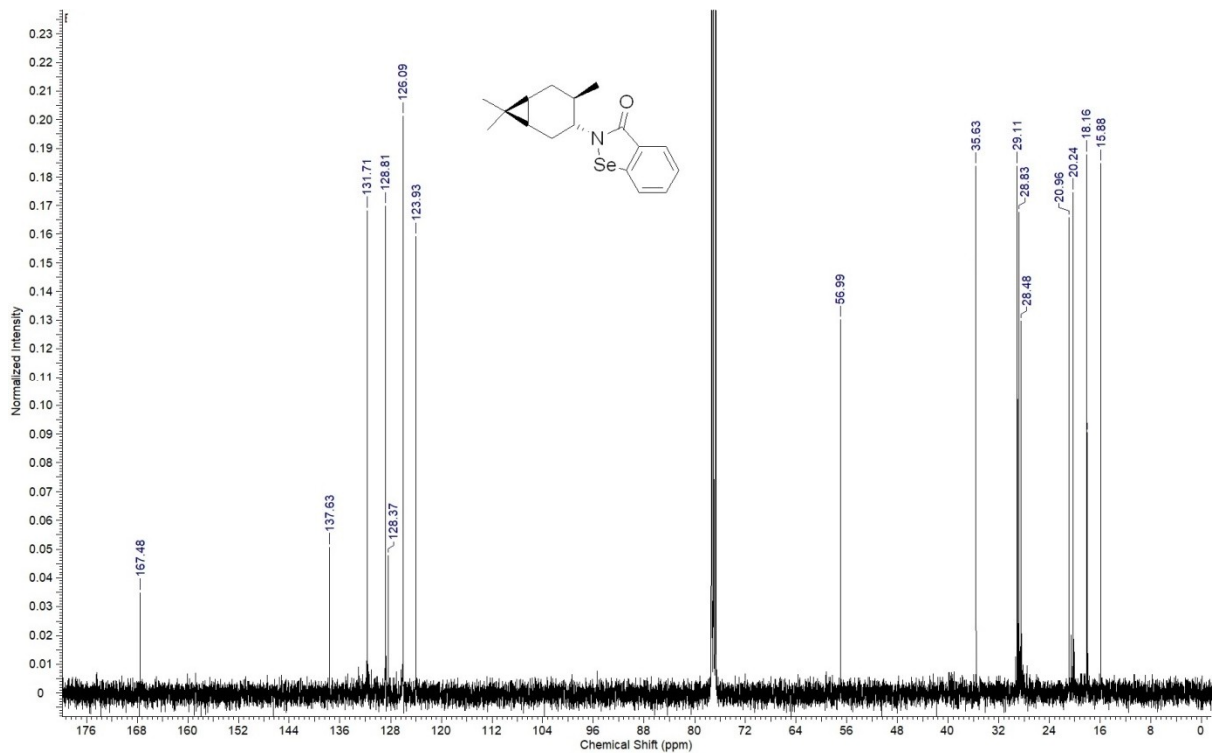

(b)

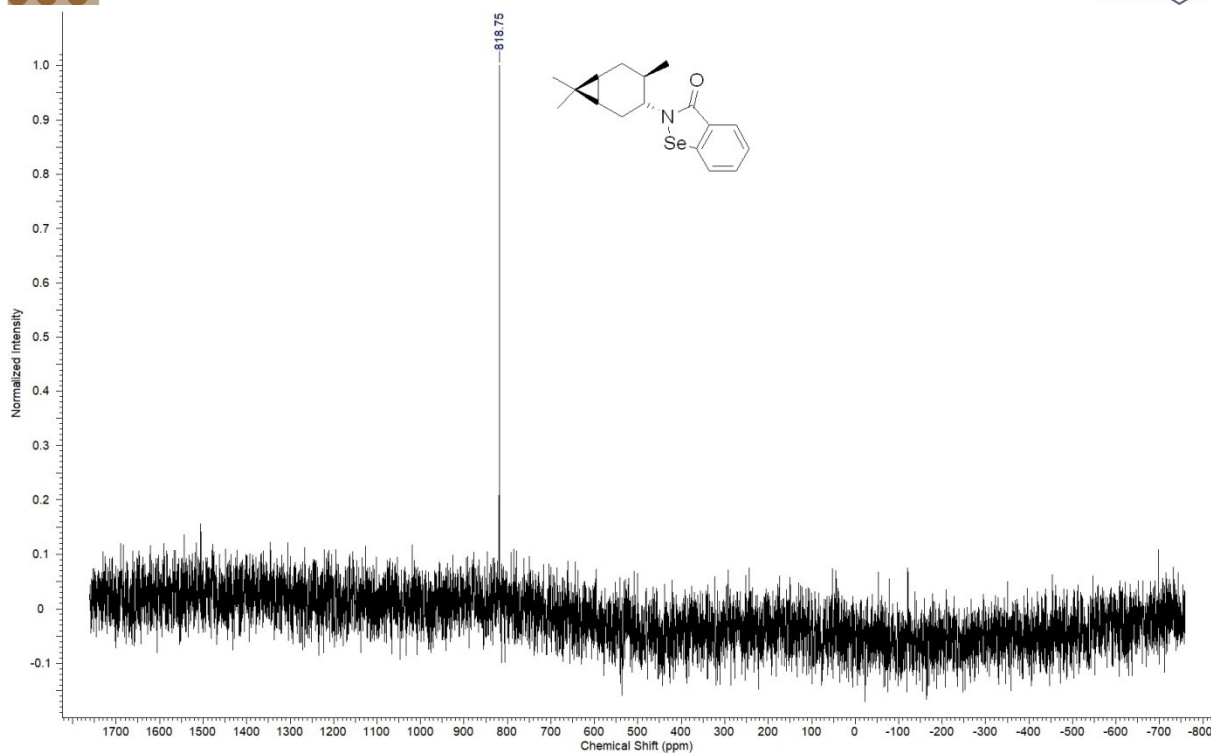

(c)

**Figure S8.** (a)  $^1\text{H}$  NMR, (b)  $^{13}\text{C}$  NMR, and (c)  $^{77}\text{Se}$  NMR  $\text{-}N\text{-}(1S,3R,4R,6R)\text{-}(4\text{-isocaranyl})\text{-}1,2\text{-benzisoselenazol-}3(2\text{H})\text{-one}$  **29**.

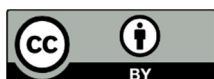

© 2019 by the authors. Licensee MDPI, Basel, Switzerland. This article is an open access article distributed under the terms and conditions of the Creative Commons Attribution (CC BY) license (<http://creativecommons.org/licenses/by/4.0/>).
